# Supplementary material for: Plant Community and Soil Properties Regulate Space-Scale Dependence of Species Diversity under Grazing Exclusion and Rest Grazing in the Qilian Mountains of China
Source: MDPI journal article supplement (doi:10.3390/agriculture13101966), 2023-10-09
Supplement: s1 [file s1]

Table S1 The list of species in the study

| Numbers | Species                                                                    | Genus              | Family           |
|---------|----------------------------------------------------------------------------|--------------------|------------------|
| 1       | <i>Asperugoprocumbens</i> L.                                               | <i>Asperugo</i>    | Boraginaceae     |
| 2       | <i>Trigonotispeduncularis</i> (Trev.) Benth. ex Baker et Moore             | <i>Trigonotis</i>  | Boraginaceae     |
| 3       | <i>Meconopsishorridula</i> Hook. f. et Thoms.                              | <i>Meconopsis</i>  | Papaveraceae     |
| 4       | <i>Corydalisdasyptera</i> Maxim.                                           | <i>Corydalis</i>   | Papaveraceae     |
| 5       | <i>Urticatriangularis</i> Hand.-Mazz. subsp. <i>trichocarpa</i> C. J. Chen | <i>Urtica</i>      | Urticaceae       |
| 6       | <i>Convolvulusammannii</i> Desr.                                           | <i>Convolvulus</i> | Convolvulaceae   |
| 7       | <i>Pedicularisarmata</i> Maxim.                                            | <i>Pedicularis</i> | Scrophulariaceae |
| 8       | <i>Pediculariskansuensis</i> Maxim.                                        | <i>Pedicularis</i> | Scrophulariaceae |
| 9       | <i>Pedicularisszetschuanica</i> Maxim.                                     | <i>Pedicularis</i> | Scrophulariaceae |
| 10      | <i>Pedicularischinensis</i> Maxim.                                         | <i>Pedicularis</i> | Scrophulariaceae |
| 11      | <i>Pedicularisplicata</i> Maxim.                                           | <i>Pedicularis</i> | Scrophulariaceae |
| 12      | <i>Veronicaeriogyne</i> H. Winkl.                                          | <i>Veronica</i>    | Scrophulariaceae |
| 13      | <i>Veronicadidyma</i> Tenore                                               | <i>Veronica</i>    | Scrophulariaceae |
| 14      | <i>Lanceatibetica</i> Hook. f. et Hsuan                                    | <i>Lancea</i>      | Scrophulariaceae |
| 15      | <i>Euphrasiaregelii</i> Wettst.                                            | <i>Euphrasia</i>   | Scrophulariaceae |
| 16      | <i>Euphrasiapectinata</i> Ten.                                             | <i>Euphrasia</i>   | Scrophulariaceae |
| 17      | <i>Stellariaimedia</i> (L.) Cyr.                                           | <i>Stellaria</i>   | Caryophyllaceae  |
| 18      | <i>Stellariaumbellata</i> Turcz.                                           | <i>Stellaria</i>   | Caryophyllaceae  |
| 19      | <i>Cerastiumarvense</i> L.                                                 | <i>Cerastium</i>   | Caryophyllaceae  |
| 20      | <i>Lepidiumapetalum</i>                                                    | <i>Lepidium</i>    | Cruciferae       |
| 21      | <i>Torulariahumilis</i> (C. A. Mey.) O. E. Schulz                          | <i>Torularia</i>   | Cruciferae       |

|    |                                                        |                   |              |
|----|--------------------------------------------------------|-------------------|--------------|
| 22 | <i>Cardaminehirsuta</i>                                | <i>Cardamine</i>  | Cruciferae   |
| 23 | <i>Drabanemorosa</i>                                   | <i>Draba</i>      | Cruciferae   |
| 24 | <i>Blysmussinocompressus</i>                           | <i>Blysmus</i>    | Cyperaceae   |
| 25 | <i>ScirpuspumilusVahl</i>                              | <i>Scirpus</i>    | Cyperaceae   |
| 26 | <i>Kobresiahumilis</i> (C. A. Mey. ex Trautv.) Sergiev | <i>Kobresia</i>   | Cyperaceae   |
| 27 | <i>Kobresiapygmaea</i> C. B. Clarke                    | <i>Kobresia</i>   | Cyperaceae   |
| 28 | <i>Kobresiafilifolia</i> (Turcz.) C. B. Clarke         | <i>Kobresia</i>   | Cyperaceae   |
| 29 | <i>Kobresiamyosuroides</i> (Villars) Fiori             | <i>Kobresia</i>   | Cyperaceae   |
| 30 | <i>Carexaridula</i> V. Krecz.                          | <i>Carex</i>      | Cyperaceae   |
| 31 | <i>Bupleurumchinense</i> DC.                           | <i>Bupleurum</i>  | Umbelliferae |
| 32 | <i>Carumcarvi</i> L.                                   | <i>Carum</i>      | Umbelliferae |
| 33 | <i>Daucuscarota</i> L.                                 | <i>Daucus</i>     | Umbelliferae |
| 34 | <i>Fragariaorientalis</i> Lozinsk.                     | <i>Fragaria</i>   | Rosaceae     |
| 35 | <i>Sibbaldiaadpressa</i> Bge.                          | <i>Sibbaldia</i>  | Rosaceae     |
| 36 | <i>Sibbaldiaprocombens</i> L.                          | <i>Sibbaldia</i>  | Rosaceae     |
| 37 | <i>Potentillabetonicifolia</i> Poir.                   | <i>Potentilla</i> | Rosaceae     |
| 38 | <i>Potentillasimulatrix</i> Wolf                       | <i>Potentilla</i> | Rosaceae     |
| 39 | <i>Potentillaundersiana</i> Royle                      | <i>Potentilla</i> | Rosaceae     |
| 40 | <i>Potentillamulticaulis</i> Bge.                      | <i>Potentilla</i> | Rosaceae     |
| 41 | <i>Potentillamultifida</i> L.                          | <i>Potentilla</i> | Rosaceae     |
| 42 | <i>Potentilla bifurca</i> L.                           | <i>Potentilla</i> | Rosaceae     |
| 43 | <i>Potentillafruticosa</i> L.                          | <i>Potentilla</i> | Rosaceae     |
| 44 | <i>Potentillaanserina</i> L.                           | <i>Potentilla</i> | Rosaceae     |
| 45 | <i>Potentillafragarioides</i> L.                       | <i>Potentilla</i> | Rosaceae     |
| 46 | <i>Potentillachinensis</i> Ser.                        | <i>Potentilla</i> | Rosaceae     |

|    |                                                                             |                     |               |
|----|-----------------------------------------------------------------------------|---------------------|---------------|
| 47 | <i>Colurialongifolia</i> Maxim.                                             | <i>Coluria</i>      | Rosaceae      |
| 48 | <i>Rubuspreptanthus</i> Focke                                               | <i>Rubus</i>        | Rosaceae      |
| 49 | <i>Galium aparine</i> Linn. var. <i>tenerum</i> (Gren. et Godr.) Rchb.      | <i>Galium</i>       | Rubiaceae     |
| 50 | <i>Rubiaccordifolia</i> L.                                                  | <i>Rubia</i>        | Rubiaceae     |
| 51 | <i>Equisetumarvense</i> L.                                                  | <i>Equisetum</i>    | Equisetaceae  |
| 52 | <i>Delphiniumtrichophorum</i> Franch.                                       | <i>Delphinium</i>   | Ranunculaceae |
| 53 | <i>Trolliuschinensis</i> Bunge                                              | <i>Trollius</i>     | Ranunculaceae |
| 54 | <i>Calthapalustris</i> L.                                                   | <i>Caltha</i>       | Ranunculaceae |
| 55 | <i>Ranunculus glabricaulis</i> (Hand.-Mazz.) L. Liou                        | <i>Ranunculus</i>   | Ranunculaceae |
| 56 | <i>Ranunculustanguticus</i> (Maxim.) Ovcz.                                  | <i>Ranunculus</i>   | Ranunculaceae |
| 57 | <i>Ranunculusjaponicus</i> Thunb.                                           | <i>Ranunculus</i>   | Ranunculaceae |
| 58 | <i>Thalictrumalpinum</i> L.                                                 | <i>Thalictrum</i>   | Ranunculaceae |
| 59 | <i>Thalictrumaquilegifolium</i> Linn. var. <i>sibiricum</i> Regel et Tiling | <i>Thalictrum</i>   | Ranunculaceae |
| 60 | <i>Aconitumgymnandrum</i> Maxim.                                            | <i>Aconitum</i>     | Ranunculaceae |
| 61 | <i>Geraniumpratense</i> L.                                                  | <i>Geranium</i>     | Geraniaceae   |
| 62 | <i>Geraniumpylzowianum</i> Maxim.                                           | <i>Geranium</i>     | Geraniaceae   |
| 63 | <i>Geraniumsibiricum</i> L.                                                 | <i>Geranium</i>     | Geraniaceae   |
| 64 | <i>Comastomapulmonarium</i> (Turcz.) Toyokuni                               | <i>Comastoma</i>    | Gentianaceae  |
| 65 | <i>Gentianellaazurea</i> (Bunge) Holub                                      | <i>Gentianella</i>  | Gentianaceae  |
| 66 | <i>Lomatogoniumrotatum</i> (L.) Fries ex Nym.                               | <i>Lomatogonium</i> | Gentianaceae  |
| 67 | <i>Gentianaaristata</i> Maxim.                                              | <i>Gentiana</i>     | Gentianaceae  |
| 68 | <i>Gentianasino-ornata</i> Balf. f.                                         | <i>Gentiana</i>     | Gentianaceae  |
| 69 | <i>Gentianascabra</i> Bunge                                                 | <i>Gentiana</i>     | Gentianaceae  |
| 70 | <i>Gentianastraminea</i> Maxim.                                             | <i>Gentiana</i>     | Gentianaceae  |
| 71 | <i>Gentianamacrophylla</i> Pall.                                            | <i>Gentiana</i>     | Gentianaceae  |

|    |                                                             |                     |              |
|----|-------------------------------------------------------------|---------------------|--------------|
| 72 | <i>Swertia tetraptera</i> Maxim.                            | <i>Swertia</i>      | Gentianaceae |
| 73 | <i>Epilobium hirsutum</i> L.                                | <i>Epilobium</i>    | Onagraceae   |
| 74 | <i>Rheum pumilum</i> Maxim.                                 | <i>Rheum</i>        | Polygonaceae |
| 75 | <i>Polygonum capitatum</i> Buch.-Ham. ex D. Don             | <i>Polygonum</i>    | Polygonaceae |
| 76 | <i>Polygonum viviparum</i> L. var. <i>angustum</i> A. J. Li | <i>Polygonum</i>    | Polygonaceae |
| 77 | <i>Polygonum macrophyllum</i> D. D                          | <i>Polygonum</i>    | Polygonaceae |
| 78 | <i>Polygonum viviparum</i> L.                               | <i>Polygonum</i>    | Polygonaceae |
| 79 | <i>Saussurea retroserrata</i>                               | <i>Saussurea</i>    | Compositae   |
| 80 | <i>Saussurea japonica</i> (Thunb.) DC.                      | <i>Saussurea</i>    | Compositae   |
| 81 | <i>Saussurea pulchella</i> (Fisch.) Fisch.                  | <i>Saussurea</i>    | Compositae   |
| 82 | <i>Saussurea globosa</i> Chen                               | <i>Saussurea</i>    | Compositae   |
| 83 | <i>Saussurea hieracioides</i>                               | <i>Saussurea</i>    | Compositae   |
| 84 | <i>Saussurea katochaete</i>                                 | <i>Saussurea</i>    | Compositae   |
| 85 | <i>Artemisia sacrorum</i> Ledeb.                            | <i>Artemisia</i>    | Compositae   |
| 86 | <i>Artemisia hedinii</i> Ostenf. et Pauls.                  | <i>Artemisia</i>    | Compositae   |
| 87 | <i>Artemisia sieversiana</i> Ehrhart ex Willd.              | <i>Artemisia</i>    | Compositae   |
| 88 | <i>Artemisia ordosica</i> Krasch                            | <i>Artemisia</i>    | Compositae   |
| 89 | <i>Artemisia frigida</i> Willd.                             | <i>Artemisia</i>    | Compositae   |
| 90 | <i>Leontopodium leontopodioides</i> (Willd. ) Beauv.        | <i>Leontopodium</i> | Compositae   |
| 91 | <i>Leontopodium calocephalum</i> (Franch.) Beauv.           | <i>Leontopodium</i> | Compositae   |
| 92 | <i>Cirsium souliei</i>                                      | <i>Cirsium</i>      | Compositae   |
| 93 | <i>Tanacetum vulgare</i> L.                                 | <i>Tanacetum</i>    | Compositae   |
| 94 | <i>Taraxacum mongolicum</i> Hand.-Mazz.                     | <i>Taraxacum</i>    | Compositae   |
| 95 | <i>Ligularia luciformis</i> (C. Winkl.) Hand.-Mazz.         | <i>Ligularia</i>    | Compositae   |
| 96 | <i>Anaphalis lactea</i> Maxim.                              | <i>Anaphalis</i>    | Compositae   |

|     |                                                                                               |                    |                |
|-----|-----------------------------------------------------------------------------------------------|--------------------|----------------|
| 97  | <i>Eupatoriumheterophyllum</i> DC.                                                            | <i>Eupatorium</i>  | Compositae     |
| 98  | <i>Astertataricus</i> L. f.                                                                   | <i>Aster</i>       | Compositae     |
| 99  | <i>Codonopsispilosula</i> (Franch.) Nannf.                                                    | <i>Codonopsis</i>  | Campanulaceae  |
| 100 | <i>Violaverecunda</i> A. Gray                                                                 | <i>Viola</i>       | Violaceae      |
| 101 | <i>Violabiflora</i> L.                                                                        | <i>Viola</i>       | Violaceae      |
| 102 | <i>Peganumharmala</i> L.                                                                      | <i>Peganum</i>     | Zygophyllaceae |
| 103 | <i>Saxifragamelanocentra</i> Franch.                                                          | <i>Saxifraga</i>   | Saxifragaceae  |
| 104 | <i>Saxifragastolonifera</i> Curt.                                                             | <i>Saxifraga</i>   | Saxifragaceae  |
| 105 | <i>Parnassiatrinervis</i> Drude                                                               | <i>Parnassia</i>   | Saxifragaceae  |
| 106 | <i>Parnassiaoreophila</i> Hance                                                               | <i>Parnassia</i>   | Saxifragaceae  |
| 107 | <i>Hippophaerhamnoides</i> L.                                                                 | <i>Hippophae</i>   | Elaeagnaceae   |
| 108 | <i>Agropyroncristatum</i> (L.) Gaertn.                                                        | <i>Agropyron</i>   | Gramineae      |
| 109 | <i>Agropyroncristatum</i> (L.) Gaertn. var. <i>pectiniforme</i> (Roem. et Schult.) H. L. Yang | <i>Agropyron</i>   | Gramineae      |
| 110 | <i>Achnatherumsplendens</i> (Trin. ) Nevski                                                   | <i>Achnatherum</i> | Gramineae      |
| 111 | <i>Achnatheruminebrians</i> (Hance) Keng                                                      | <i>Achnatherum</i> | Gramineae      |
| 112 | <i>Leymussecalinus</i> (Georgi) Tzvel.                                                        | <i>Leymus</i>      | Gramineae      |
| 113 | <i>Elymusnutans</i> Griseb.                                                                   | <i>Elymus</i>      | Gramineae      |
| 114 | <i>Koeleria macrantha</i>                                                                     | <i>Koeleria</i>    | Gramineae      |
| 115 | <i>Festucaovina</i> L.                                                                        | <i>Festuca</i>     | Gramineae      |
| 116 | <i>Poapratensis</i> L.                                                                        | <i>Poa</i>         | Gramineae      |
| 117 | <i>Poaannua</i> L.                                                                            | <i>Poa</i>         | Gramineae      |
| 118 | <i>Stipacapillata</i> L.                                                                      | <i>Stipa</i>       | Gramineae      |
| 119 | <i>Tibetiahimalaica</i> (Baker) H. P. Tsui                                                    | <i>Tibetia</i>     | Leguminosae    |
| 120 | <i>Astragalusscaberrimus</i> Bunge                                                            | <i>Astragalus</i>  | Leguminosae    |
| 121 | <i>Oxytropiskansuensis</i> Bunge                                                              | <i>Oxytropis</i>   | Leguminosae    |

|     |                                         |                    |                |
|-----|-----------------------------------------|--------------------|----------------|
| 122 | <i>Oxytropisochrocephala</i> Bunge      | <i>Oxytropis</i>   | Leguminosae    |
| 123 | <i>Oxytropisglabra</i> (Lam.) DC.       | <i>Oxytropis</i>   | Leguminosae    |
| 124 | <i>Medicagoarchiducis-nicolai</i> Sirj. | <i>Medicago</i>    | Leguminosae    |
| 125 | <i>Medicagofalcata</i> L.               | <i>Medicago</i>    | Leguminosae    |
| 126 | <i>Medicagosativa</i> L.                | <i>Medicago</i>    | Leguminosae    |
| 127 | <i>Parochetuscommunis</i>               | <i>Parochetus</i>  | Leguminosae    |
| 128 | <i>Euphorbiamicractina</i> Boiss.       | <i>Euphorbia</i>   | Euphorbiaceae  |
| 129 | <i>Euphorbiafischeriana</i> Steud.      | <i>Euphorbia</i>   | Euphorbiaceae  |
| 130 | <i>Phlomisumbrosa</i>                   | <i>Phlomis</i>     | Labiatae       |
| 131 | <i>Scutellariabaicalensis</i> Georgi    | <i>Scutellaria</i> | Labiatae       |
| 132 | <i>Eriophytonwallichii</i> Benth.       | <i>Eriophyton</i>  | Labiatae       |
| 133 | <i>Plantagoasiatica</i> L.              | <i>Plantago</i>    | Plantaginaceae |
| 134 | <i>Plantagodepressa</i> Willd.          | <i>Plantago</i>    | Plantaginaceae |
| 135 | <i>Androsaceumbellata</i> (Lour.) Merr. | <i>Androsace</i>   | Primulaceae    |
| 136 | <i>Alliumfistulosum</i>                 | <i>Allium</i>      | Liliaceae      |
| 137 | <i>Alliumsikkimense</i>                 | <i>Allium</i>      | Liliaceae      |
| 138 | <i>Alliummongolicum</i>                 | <i>Allium</i>      | Liliaceae      |
